# Supplementary material for: Co-doping of tellurium with bismuth enhances stability and photoluminescence quantum yield of Cs2AgInCl6 double perovskite nanocrystals
Source: Royal Society of Chemistry journal article supplement (doi:10.1039/d2nr04717a), 2022-01-01
Supplement: d2nr04717a1.pdf [file d2nr04717a1.pdf]

## Supplementary information

### Co-Doping of Tellurium with Bismuth Enhances Stability and Photoluminescence Quantum Yield of $\text{Cs}_2\text{AgInCl}_6$ Double Perovskite Nanocrystals

Shixun Wang,<sup>‡ a</sup> Ran Shi,<sup>‡ b</sup> Bing Tang,<sup>a</sup> Yuan Xiong,<sup>a</sup> Arsenii Portniagin,<sup>a</sup> Xin Zhao,<sup>a</sup> Stephen V. Kershaw,<sup>a</sup> Run Long,<sup>\*b</sup> and Andrey L. Rogach<sup>\*a</sup>

\* Corresponding authors

<sup>a</sup> Department of Materials Science and Engineering, and Centre for Functional Photonics (CFP), City University of Hong Kong, 83 Tat Chee Avenue, Hong Kong S.A.R. 999077, P. R. China

Email: [andrey.rogach@cityu.edu.hk](mailto:andrey.rogach@cityu.edu.hk)

<sup>b</sup> College of Chemistry, Key Laboratory of Theoretical & Computational Photochemistry of Ministry of Education, Beijing Normal University, Beijing, 100875 PR China

Email: [runlong@bnu.edu.cn](mailto:runlong@bnu.edu.cn)

<sup>‡</sup> These two authors contributed equally to this research

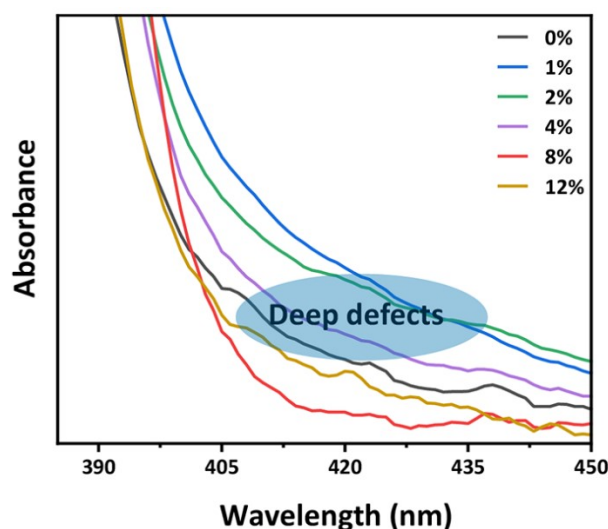

**Figure S1.** Absorption spectra (enlarged tail region) of  $\text{Cs}_2\text{AgInCl}_6$ :0% Te, 1% Bi and Te/Bi-co-doped ( $\text{Cs}_2\text{AgInCl}_6$ :x% Te, 1% Bi) NCs

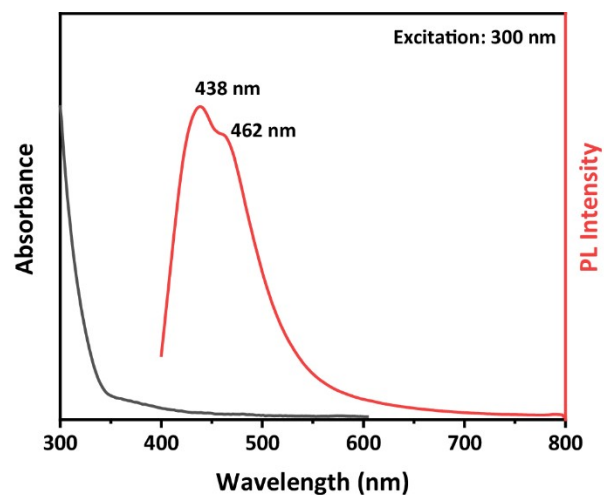

**Figure S2.** Absorption and PL spectra of  $\text{Cs}_2\text{AgInCl}_6$  NCs solely doped by 8% tellurium precursors (without any Bi co-dopant).

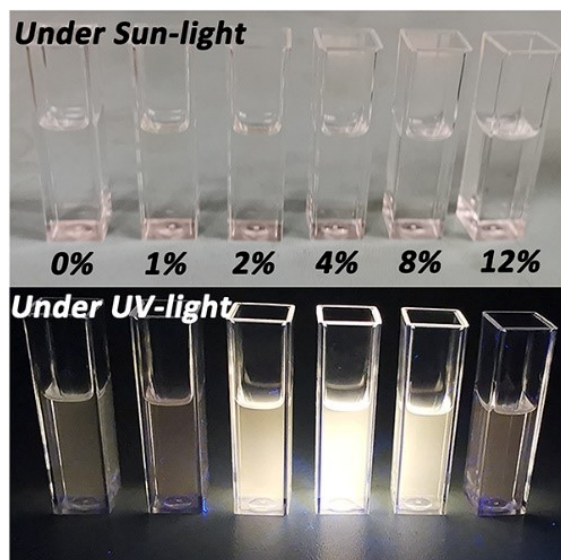

**Figure S3.** Photographs of  $\text{Cs}_2\text{AgInCl}_6$ :x% Te, 1% Bi NCs ( $x=0, 1, 2, 4, 8,$  and  $12$ ) under sun-light and UV-light. Note that in the bottom row the camera lens was focusing on the middle sample ( $\text{Cs}_2\text{AgInCl}_6$ :4% Te, 1% Bi NCs), otherwise the emission of samples with low PL QYs could hardly be observed.

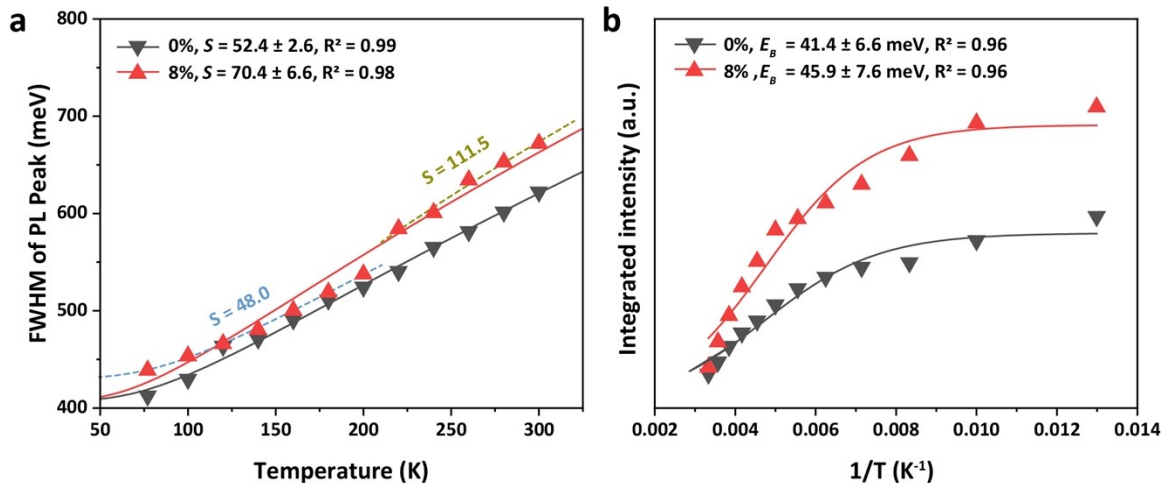

**Figure S4.** (a) Thermal evolution of the PL FWHM and (b) temperature-dependent integrated PL intensity of  $\text{Cs}_2\text{AgInCl}_6$ :0% Te, 1% Bi and  $\text{Cs}_2\text{AgInCl}_6$ :8% Te, 1% Bi NCs.

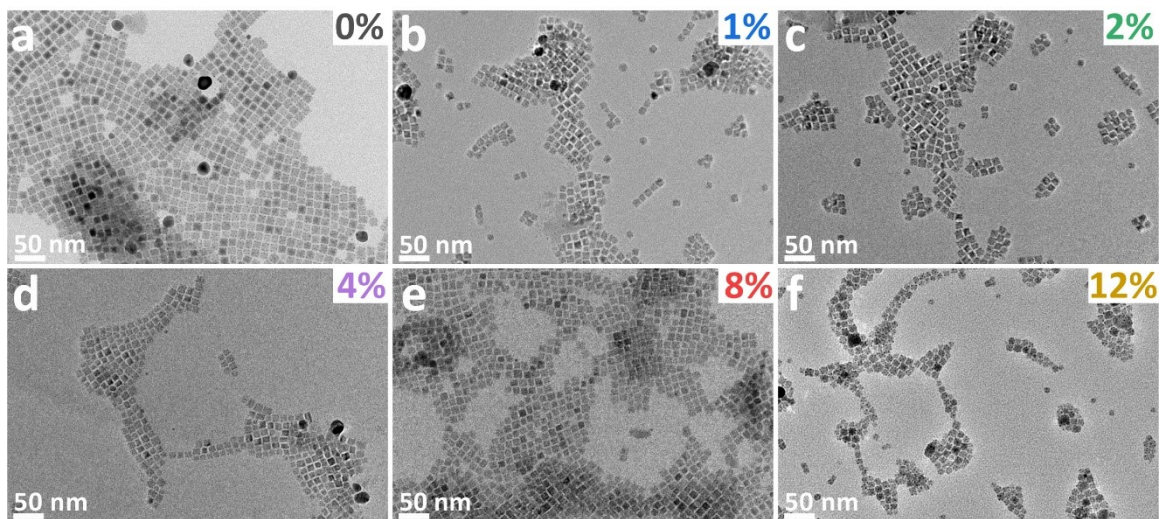

**Figure S5.** Wide-view TEM images of  $\text{Cs}_2\text{AgInCl}_6$ :x% Te, 1% Bi NCs (x=0, 1, 2, 4, 8, 12).

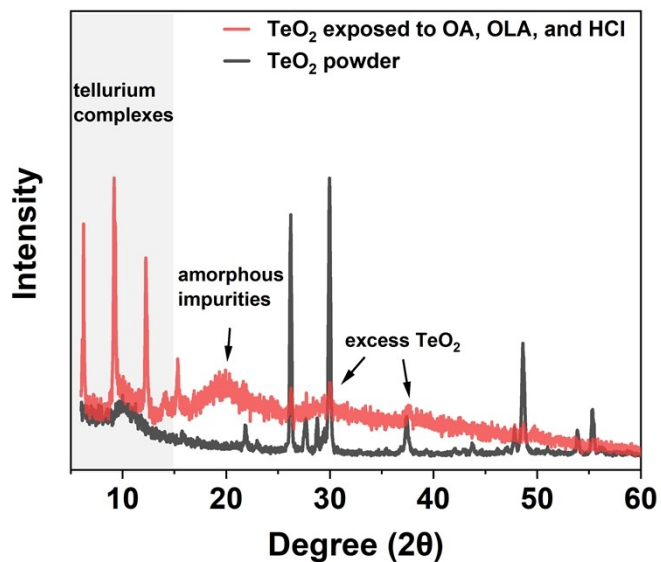

**Figure S6.** XRD pattern of  $\text{TeO}_2$  precursor in the original form and exposed to OA, OLA, and hydrogen chloride. Emerging diffraction peaks below  $15^\circ$  could belong to tellurium complexes such as  $\text{R}_2\text{TeO}$  and/or  $\text{Te}_2\text{O}_3\text{Cl}_2$ .

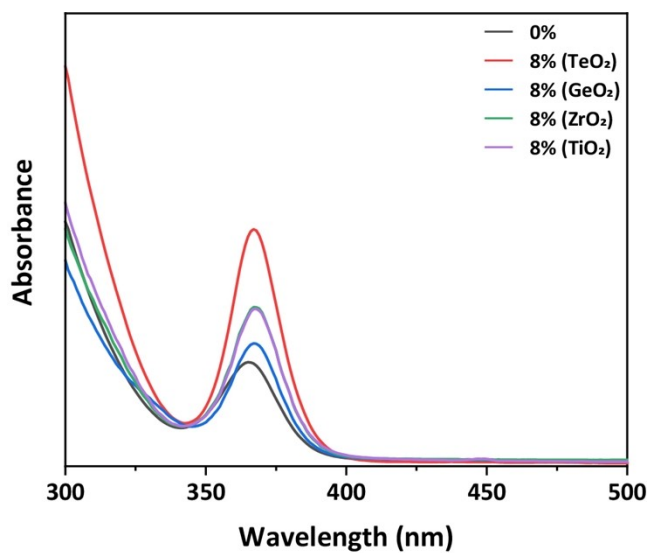

**Figure S7.** Absorption spectra of  $\text{Cs}_2\text{AgInCl}_6$ :0% Te, 1% Bi NCs,  $\text{Cs}_2\text{AgInCl}_6$ :8% Te, 1% Bi NCs (fed by 8%  $\text{TeO}_2$ ), and NCs fed by 1% Bi and 8% of inert dioxides  $\text{GeO}_2$ ,  $\text{ZrO}_2$ , and  $\text{TiO}_2$ .

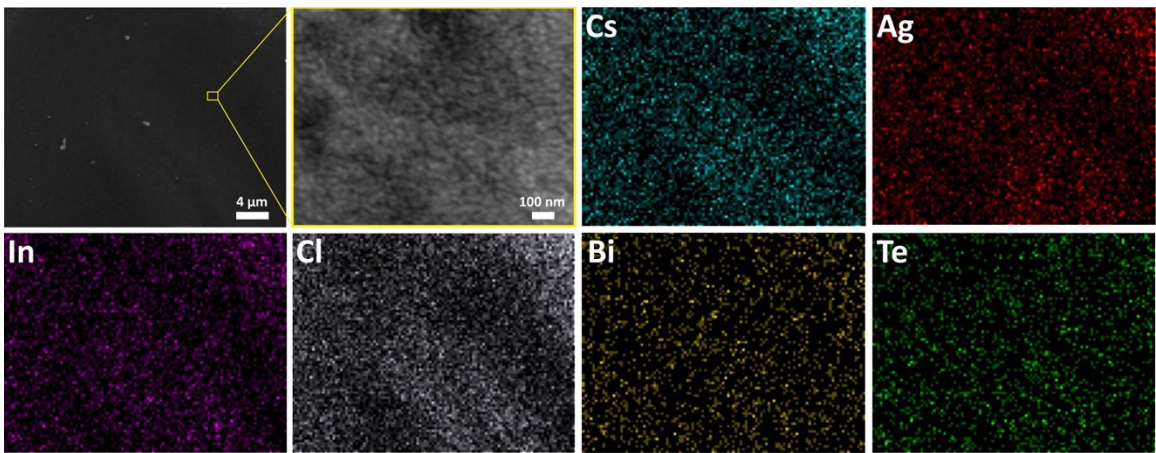

**Figure S8.** SEM image, and corresponding elemental mapping images for Cs, Ag, In, Cl, Bi and Te elements of thin films based on  $\text{Cs}_2\text{AgInCl}_6$ :8% Te, 1% Bi NCs that were stored in the refrigerator for around one month.

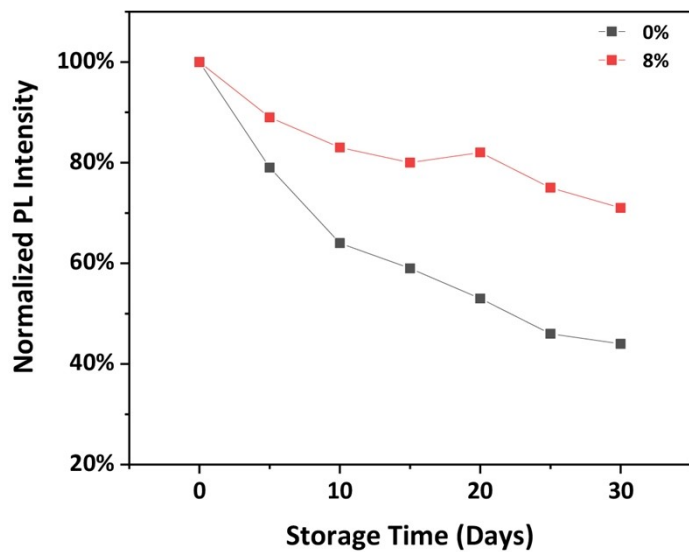

**Figure S9.** Normalized PL intensity of  $\text{Cs}_2\text{AgInCl}_6$ :0% Te, 1% Bi and  $\text{Cs}_2\text{AgInCl}_6$ :8% Te, 1% Bi NCs after storing in the refrigerator for around one month.

**Table S1.** Comparison of the PL characteristics of the B<sup>III</sup> site doped Cs<sub>2</sub>AgInCl<sub>6</sub> NCs. RT: room temperature.

| Composition (NCs)                                                     | Reaction temperature | Excitation | PL peak  | PL QY | Year             | Refs         |
|-----------------------------------------------------------------------|----------------------|------------|----------|-------|------------------|--------------|
| Cs <sub>2</sub> AgInCl <sub>6</sub>                                   | 105 °C               | 300 nm     | 560 nm   | 1.6%  | 2018             | <sup>1</sup> |
| Cs <sub>2</sub> AgInCl <sub>6</sub> :1.6% Mn                          | 105 °C               | 290 nm     | 620 nm   | 16%   | 2018             | <sup>1</sup> |
| Cs <sub>2</sub> AgIn <sub>0.9</sub> Bi <sub>0.1</sub> Cl <sub>6</sub> | RT                   | -          | 570 nm   | 2%    | 2018             | <sup>2</sup> |
| Cs <sub>2</sub> AgInCl <sub>6</sub>                                   | 100 °C               | 300 nm     | > 550 nm | 0.6%  | 2019             | <sup>3</sup> |
| Cs <sub>2</sub> AgInCl <sub>6</sub> :1% Bi                            | 260 °C               | 368 nm     | 580 nm   | 11.4% | 2019             | <sup>4</sup> |
| Cs <sub>2</sub> AgInCl <sub>6</sub> : Cu <sup>2+</sup>                | 220 °C               | 350 nm     | 460 nm   | -     | 2020             | <sup>5</sup> |
| Cs <sub>2</sub> AgInCl <sub>6</sub> : 1% Bi-2% Ce                     | 260 °C               | 375 nm     | 580 nm   | 26%   | 2021             | <sup>6</sup> |
| <b>Cs<sub>2</sub>AgInCl<sub>6</sub>:8% Te, 1% Bi</b>                  | 280 °C               | 370 nm     | 591 nm   | 34%   | <b>This work</b> |              |

**Table S2.** Optical parameters of Cs<sub>2</sub>AgInCl<sub>6</sub>:x% Te, 1% Bi NCs (x=0, 1, 2, 4, 8, 12), including PL QY, average lifetime of excitons  $\tau_{\text{avg}}$  and the radiative recombination rate  $K_r$ .

| Samples                                             | PL QY (%) | $\tau_{\text{avg}}$ ( $\mu\text{s}$ ) | $K_r$ ( $\times 10^5 \text{ s}^{-1}$ ) |
|-----------------------------------------------------|-----------|---------------------------------------|----------------------------------------|
| Cs <sub>2</sub> AgInCl <sub>6</sub> : 0% Te, 1% Bi  | 12        | 1.06                                  | 1.13                                   |
| Cs <sub>2</sub> AgInCl <sub>6</sub> : 1% Te, 1% Bi  | 5         | 0.63                                  | 0.79                                   |
| Cs <sub>2</sub> AgInCl <sub>6</sub> : 2% Te, 1% Bi  | 13        | 0.94                                  | 1.38                                   |
| Cs <sub>2</sub> AgInCl <sub>6</sub> : 4% Te, 1% Bi  | 22        | 1.11                                  | 1.98                                   |
| Cs <sub>2</sub> AgInCl <sub>6</sub> : 8% Te, 1% Bi  | 34        | 0.96                                  | 3.54                                   |
| Cs <sub>2</sub> AgInCl <sub>6</sub> : 12% Te, 1% Bi | 10        | 1.05                                  | 0.95                                   |

**Table S3.** XPS analysis of elemental ratios in Cs<sub>2</sub>AgInCl<sub>6</sub> NCs doped by 1% Bi and different amounts of Te.

| Samples                                            | Cl:In | In:Ag | Cl:Ag |
|----------------------------------------------------|-------|-------|-------|
| Cs <sub>2</sub> AgInCl <sub>6</sub> :0% Te, 1% Bi  | 6.4   | 1.2   | 7.5   |
| Cs <sub>2</sub> AgInCl <sub>6</sub> :1% Te, 1% Bi  | 6.5   | 1.2   | 7.7   |
| Cs <sub>2</sub> AgInCl <sub>6</sub> :8% Te, 1% Bi  | 5.9   | 1.1   | 6.7   |
| Cs <sub>2</sub> AgInCl <sub>6</sub> :12% Te, 1% Bi | 6.5   | 1.2   | 7.5   |

## References

1. F. Locardi, M. Cirignano, D. Baranov, Z. Dang, M. Prato, F. Drago, M. Ferretti, V. Pinchetti, M. Fanciulli, S. Brovelli, et al., *J. Am. Chem. Soc.*, 2018, **140**, 12989-12995.
2. B. Yang, X. Mao, F. Hong, W. Meng, Y. Tang, X. Xia, S. Yang, W. Deng and K. Han, *J. Am. Chem. Soc.*, 2018, **140**, 17001-17006.
3. J. C. Dahl, W. T. Osowiecki, Y. Cai, J. K. Swabeck, Y. Bekenstein, M. Asta, E. M. Chan and A. P. Alivisatos, *Chem. Mater.*, 2019, **31**, 3134-3143.
4. Y. Liu, Y. Jing, J. Zhao, Q. Liu and Z. Xia, *Chem. Mater.*, 2019, **31**, 3333-3339.
5. Q. Liao, J. Chen, L. Zhou, T. Wei, L. Zhang, D. Chen, F. Huang, Q. Pang and J. Z. Zhang, *J. Phys. Chem. Lett.*, 2020, **11**, 8392-8398.
6. S. Wang, J. Qi, S. V. Kershaw and A. L. Rogach, *ACS Nanosci. Au*, 2021, **2**, 93-101.
